# Supplementary material for: Ultrasonography in trauma: a nation-wide cross-sectional investigation
Source: Crit Ultrasound J. 2017 Jun 20;9:16. doi: 10.1186/s13089-017-0071-2 (PMC5479771; doi:10.1186/s13089-017-0071-2)
Supplement: Supplementary file 1 — Additional file 1. Appendix 1 [file 13089_2017_71_MOESM1_ESM.docx]

**APPENDIX for: Ultrasonography in Trauma – A national cross sectional investigation**

**1. Interview guide // Ultrasonography in trauma**

Questionnaire for the trauma team leader

Date: ____ / ____ / _____, Time: _____ : _____ / Investigator: ______________________________

Hospital: _____________________________ / Department: ________________________________

: Gives oral informed consent to participate in the study

Name: _____________________________________

Is ultrasonography used in trauma care?:

: Always : Often (>50%) : Rarely (<50%) : Never/Hardly ever : Unknown

Who performs the ultrasound examinations, if they are performed?:

: Radiologist : Anesthesiologist : Surgeon : Emergency : Other: __________________

Which modality is performed for trauma?:

: FAST : eFAST : Focused Cardiac ultrasound : Vascular Access

: Focused ultrasound of the lungs : Other: _______________________________________

Are the results of the ultrasonography examination documented in the patient chart?:

: Always : Often (>50%) : Rarely (<50%) : Never/Hardly ever : Unknown

Are the images stored?

: Always : Often (>50%) : Rarely (<50%) : Never/Hardly ever : Unknown

Only if special pathology is found: ________________________________________

Where are the images stored?:

Locally on the US machine Server In the patient chartOther: _______________
